# Supplementary material for: Photocurrent, humidity sensitivity and proton conductivity properties of a new sulfide semiconductor CsCuS4
Source: Royal Society of Chemistry journal article supplement (doi:10.1039/d2dt00143h), 2022-01-01
Supplement: d2dt00143h2.pdf [file d2dt00143h2.pdf]

# Supporting Information

## Photocurrent, Humidity Sensitive and Proton Conductive Properties of a New Sulfide Semiconductor CsCuS<sub>4</sub>

Qiu-Nan Yan,<sup>a,b</sup> Bin-Wen Liu,<sup>a</sup> Xiao-Ming Jiang,<sup>\*,a</sup> Jin-Xu Zhao,<sup>a,b</sup> Shao-Min Pei,<sup>a</sup> Wen-Fa Chen,<sup>a</sup> and Guo-Cong Guo<sup>\*,a</sup>

<sup>a</sup> State Key Laboratory of Structural Chemistry, Fujian Institute of Research on the Structure of Matter, Chinese Academy of Sciences, Fuzhou, Fujian 350002, China.

<sup>b</sup> School of Physical Science and Technology, ShanghaiTech University, Shanghai 201210, China.

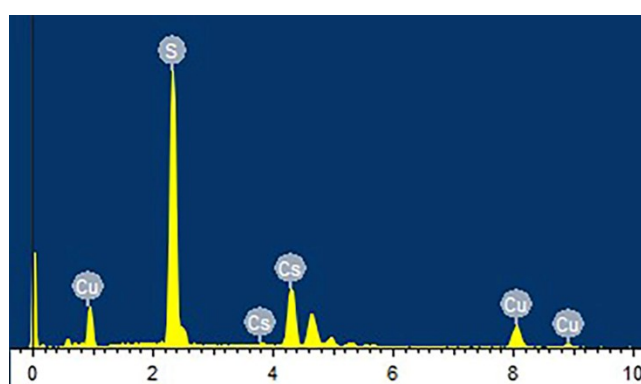

**Figure S1.** The EDX spectra of **1**.

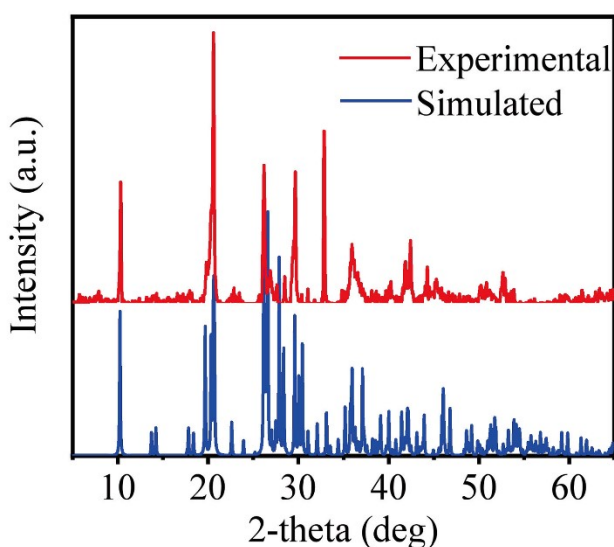

**Figure S2.** Simulated and experimental powder X-ray diffraction patterns of **1**.

**Table S1.** Fractional atomic coordinates ( $\times 10^4$ ) and equivalent isotropic displacement parameters ( $\text{\AA}^2 \times 10^3$ ) for **1**.

| Atom | <i>x</i>   | <i>y</i>   | <i>z</i>   | <i>U</i> (eq) |
|------|------------|------------|------------|---------------|
| Cs1  | 3751.7(19) | 6434.8(15) | 2585.3(12) | 37.0(4)       |
| Cu1  | 2537(4)    | 84(3)      | 99(2)      | 33.1(5)       |
| S1   | 118(7)     | 825(5)     | 8176(5)    | 31.0(8)       |
| S2   | 6742(7)    | 2811(5)    | 1364(5)    | 31.1(8)       |
| S3   | 858(8)     | 1860(6)    | 3682(4)    | 35.5(9)       |
| S4   | 7403(8)    | 2422(7)    | 3517(5)    | 40.0(10)      |

**Table S2.** Selected bond lengths ( $\text{\AA}$ ) of **1**.

| Atom1 | Atom2 | Length/ $\text{\AA}$ | Atom1 | Atom2 | Length/ $\text{\AA}$ |
|-------|-------|----------------------|-------|-------|----------------------|
| Cu1   | S1    | 2.338(4)             | S1    | S3    | 2.079(6)             |
| Cu1   | S2    | 2.349(4)             | S2    | S4    | 2.076(6)             |
| Cu1   | S1    | 2.360(4)             | S3    | S4    | 2.056(6)             |
| Cu1   | S2    | 2.368(4)             |       |       |                      |
